# Supplementary material for: Accurate Prediction of Protein Complex Stoichiometry by Integrating AlphaFold3 and Template Information
Source: Research Square preprint supplement (doi:10.21203/rs.3.rs-5855710/v1), 2025-02-06
Supplement: Supplementary file 1 [file 5dd9824d1e266fbd7af90e38.docx]

**Table S1.** The stoichiometry prediction accuracy of the 21 CASP16 predictors on 28 Phase 0 targets. Bold denotes the highest accuracy. MULTICOM_AI ranked at top in terms of the accuracy of both top-1 prediction and all-predictions.

| **Predictor** | **Accuracy of top-1 prediction** | **Accuracy of all-predictions** | **Average** |
| --- | --- | --- | --- |
| MULTICOM_AI | **0.714** | **0.929** | **0.8215** |
| NKRNA-s1 | **0.714** | 0.786 | 0.75 |
| Zheng-Multimer2 | 0.679 | 0.714 | 0.6965 |
| Schneidman3 | 0.679 | 0.714 | 0.6965 |
| Zheng4 | 0.679 | 0.679 | 0.679 |
| MIEnsembles-Server5 | 0.643 | 0.750 | 0.6965 |
| CSSB_experimental6 | 0.643 | 0.714 | 0.6785 |
| CSSB-Human7 | 0.643 | 0.714 | 0.6785 |
| GromihaLab8 | 0.643 | 0.643 | 0.643 |
| KiharaLab9 | 0.607 | 0.750 | 0.6785 |
| OpenComplex10 | 0.500 | **0.929** | 0.7145 |
| OpenComplex_Server10 | 0.500 | 0.893 | 0.6965 |
| MultiFOLD211 | 0.500 | 0.500 | 0.5 |
| McGuffin12 | 0.500 | 0.500 | 0.5 |
| elofsson13 | 0.429 | 0.643 | 0.536 |
| PEZYFoldings14 | 0.429 | 0.464 | 0.4465 |
| AF3-server13 | 0.393 | 0.536 | 0.4645 |
| kiharalab_server9 | 0.286 | 0.286 | 0.286 |
| APOLLO15 | 0.250 | 0.250 | 0.25 |
| ARC16 | 0.143 | 0.250 | 0.1965 |
| COAST15 | 0.107 | 0.179 | 0.143 |

**Table S2.** The stoichiometry predictions of MULTICOM_AI for the 28 Phase 0 targets. Bold denotes the true stoichiometry.

| **Target** | **Top 1 Prediction** | **Top 2 Prediction** | **Top 3 Prediction** | **Top 4 Prediction** | **Top 5 Prediction** |
| --- | --- | --- | --- | --- | --- |
| H0208 | A2B2 | **A1B1** | A2B1 | A3B1 | A3B3 |
| H0215 | **A1B1** | A2B2 | A2B1 |  |  |
| H0217 | A2B2C2D2E2F1 |  |  |  |  |
| H0220 | **A1B4** | A1B1 |  |  |  |
| H0222 | **A1B1C1** |  |  |  |  |
| H0223 | **A1B1C1** |  |  |  |  |
| H0225 | **A1B1C1** |  |  |  |  |
| H0227 | **A1B6** |  |  |  |  |
| H0229 | A2B2 | **A1B1** |  |  |  |
| H0230 | A2B2 | **A1B1** |  |  |  |
| H0232 | **A2B2** |  |  |  |  |
| H0233 | **A2B2C2** | A1B1C1 |  |  |  |
| H0236 | A3B3 | **A3B6** |  |  |  |
| H0244 | A2B2C1 | A1B1C1 | **A2B2C2** | A1B2C1 |  |
| H0245 | **A1B1** |  |  |  |  |
| H0258 | **A1B2** | A1B1 |  |  |  |
| H0265 | A1B1 | **A2B2** |  |  |  |
| H0267 | A1B1 | A4B4 | **A2B2** |  |  |
| H0272 | **A1B1C1D1E1F1G1H1I1** |  |  |  |  |
| T0206o | **A2** | A4 | A6 | A8 |  |
| T0218o | **A2** | A3 |  |  |  |
| T0234o | **A3** |  |  |  |  |
| T0235o | **A6** | A5 |  |  |  |
| T0237o | **A4** |  |  |  |  |
| T0240o | **A3** |  |  |  |  |
| T0257o | **A3** |  |  |  |  |
| T0259o | **A3** |  |  |  |  |
| T0270o | **A6** | A3 |  |  |  |

**Table S3.** The 28 CASP16 Phase 0 targets, comprising 9 homo-multimers and 19 hetero-multimers, along with their stoichiometry information. Unique subunits in each target are represented by letters (A, B, C, etc.), with the number following each letter indicating the number of copies for each subunit. For example, "A1B2" signifies a complex with two subunits: one copy of subunit A and two copies of subunit B.

| **Homo-multimers** | | **Hetero-multimers** | |
| --- | --- | --- | --- |
| **Target #** | **Stoichiometry** | **Target #** | **Stoichiometry** |
| T0206o | A2 | H0208 | A1B1 |
| T0218o | A2 | H0215 | A1B1 |
| T0234o | A3 | H0217 | A2B2C2D2E2F2 |
| T0235o | A6 | H0220 | A1B4 |
| T0237o | A4 | H0222 | A1B1C1 |
| T0240o | A3 | H0223 | A1B1C1 |
| T0257o | A3 | H0225 | A1B1C1 |
| T0259o | A3 | H0227 | A1B6 |
| T0270o | A6 | H0229 | A1B1 |
|  |  | H0230 | A1B1 |
|  |  | H0232 | A2B2 |
|  |  | H0233 | A2B2C2 |
|  |  | H0236 | A3B6 |
|  |  | H0244 | A2B2C2 |
|  |  | H0245 | A1B1 |
|  |  | H0258 | A1B2 |
|  |  | H0265 | A9B18 |
|  |  | H0267 | A2B2 |
|  |  | H0272 | A1B1C1D1E1F1G1H1I1 |

**Reference:**

1. Ni W, Wuyun Q, Hu G, et al. Protein-Nucleic Acid Complex Structure Prediction Using Deep Learning and Language Models. 16th Critical Assessment of Techniques for Protein Structure Prediction (CASP16) 2024;181.

2. Zheng W, Wuyun Q, Liu Q, et al. Protein Complex Structure Prediction Using Deep Learning and Multi-MSA Strategy in CASP16. 16th Critical Assessment of Techniques for Protein Structure Prediction (CASP16) 2024;251.

3. Shor B, Aronson A, Schneidman D. Advancing structure prediction: modeling large complexes, protein-ligand, and antibody-antigen interactions beyond AlphaFold. 16th Critical Assessment of Techniques for Protein Structure Prediction (CASP16) 2024;220.

4. Zheng W. Protein and Nucleic Acid Structure Prediction by Zheng Group in CASP16. 16th Critical Assessment of Techniques for Protein Structure Prediction (CASP16) 2024;248.

5. Wuyun Q, Ni W, Peng C, et al. Protein and Nucleic Acid Ensemble Structure Prediction in CASP16. 16th Critical Assessment of Techniques for Protein Structure Prediction (CASP16) 2024;153.

6. Shin H, Park S, Ki H, et al. Improved MSA and New Deep Learning Model for Protein Structure Prediction in CASP16. 16th Critical Assessment of Techniques for Protein Structure Prediction (CASP16) 2024;57.

7. Jo S, Ki H, Kim K, et al. Guiding Structure Prediction with Human Intuition. 16th Critical Assessment of Techniques for Protein Structure Prediction (CASP16) 2024;65.

8. K.Harini, Krishnan SR, Sharma D, et al. Biomolecular structure prediction and accuracy estimation methodology for human prediction using different modeling techniques. 16th Critical Assessment of Techniques for Protein Structure Prediction (CASP16) 2024;97.

9. Kagaya Y, Nakamura T, Verburgt J, et al. Integrating Advanced Computational Techniques for Biomolecular Structure Prediction. 16th Critical Assessment of Techniques for Protein Structure Prediction (CASP16) 2024;128.

10. Zeng M, Yu J, Chen Z, et al. OpenComplex-2: A Biomolecular Foundation Model. 16th Critical Assessment of Techniques for Protein Structure Prediction (CASP16) 2024;184.

11. McGuffin LJ, Genc AG, Alhaddad SN, et al. Automated Sampling, Quality Assessment and Refinement of Tertiary and Quaternary Structure Models using the MultiFOLD2 Server. 16th Critical Assessment of Techniques for Protein Structure Prediction (CASP16) 2024;176.

12. McGuffin LJ, Edmunds NS, Genc AG, et al. Manual Prediction of Protein Tertiary and Quaternary Structures, Model Quality, Protein-Ligand Interactions and Ensembles. 16th Critical Assessment of Techniques for Protein Structure Prediction (CASP16) 2024;149.

13. Elofsson A. AlphaFold3 in CASP16. 16th Critical Assessment of Techniques for Protein Structure Prediction (CASP16) 2024;14.

14. Oda T, Ishikawa H. PEZYFoldings pipeline in CASP16. 16th Critical Assessment of Techniques for Protein Structure Prediction (CASP16) 2024;196.

15. Siciliano AJ, Wang Z. COAST: Protein Complex Accuracy Estimation Transformer. 16th Critical Assessment of Techniques for Protein Structure Prediction (CASP16) 2024;43.

16. Shrestha B, Siciliano AJ, Wang Z. ARC: Single-Model Quality Assessment of Interface Residues Using an Ensemble of Graph Neural Networks. 16th Critical Assessment of Techniques for Protein Structure Prediction (CASP16) 2024;21.
